## Gold-standard diagnostics are tarnished by lytic bacteriophage

Running Header: Lytic vibriophage reduce *Vibrio cholerae* detection

E.J. Nelson<sup>1,2†,\*</sup>, J.A. Grembi<sup>3,4†</sup>, D.L. Chao<sup>5</sup>, J.R. Andrews<sup>3</sup>, L. Alexandrova<sup>6</sup>, P. H. Rodriguez<sup>1</sup>, V.V. Ramachandran<sup>2</sup>, Md.A. Sayeed<sup>1</sup>, W. J. Wamala<sup>7</sup>, A.K. Debes<sup>8</sup>, D.A. Sack<sup>8</sup>, A. J. Hryckowian<sup>9</sup>, F. Haque<sup>10†,11</sup>, S. Khatun<sup>10†</sup>, M. Rahman<sup>10†,12</sup>, A. Chien<sup>6</sup>, A.M. Spormann<sup>4</sup>, G.K. Schoolnik<sup>3</sup>

<sup>1</sup> Departments of Pediatrics and Environmental and Global Health, University of Florida (USA)

<sup>2</sup> Department of Pediatrics, School of Medicine, Stanford University (USA)

<sup>3</sup> Department of Medicine, School of Medicine, Stanford University (USA)

<sup>4</sup> Department of Civil and Environmental Engineering, Stanford University (USA)

<sup>5</sup> Institute for Disease Modeling (USA)

<sup>6</sup> Vincent Coates Foundation Mass Spectrometry Laboratory, Stanford University (USA)

<sup>7</sup> Country Preparedness and IHR (CPI), World Health Organization (South Sudan)

<sup>8</sup> Johns Hopkins Bloomberg School of Public Health, Johns Hopkins University (USA)

<sup>9</sup> Department of Microbiology, School of Medicine, Stanford University (USA)

<sup>10</sup> Institute of Epidemiology, Disease Control and Research, Ministry of Health and Family Welfare, Government of Bangladesh. (Bangladesh)

<sup>11</sup> University College London (UK)

<sup>12</sup> International Centre for Diarrhoeal Disease Research, Bangladesh. (Bangladesh)

† Former institution

\* Address correspondence to Eric J. Nelson, MD PhD, [eric.nelson@ufl.edu](mailto:eric.nelson@ufl.edu)

Abstract: 189 words

Main text: 2344 words

1 **ABSTRACT**

2 Background. A fundamental clinical and scientific concern is how lytic bacteriophage, as well as  
3 antibiotics, impact diagnostic positivity.

4 Methods. Cholera was chosen as a model disease to investigate this important question.

5 Patients with diarrheal disease were enrolled at two remote hospitals in Bangladesh. Diagnostic  
6 performance was assessed as a function of lytic bacteriophage detection, as well as exposure  
7 to the first-line antibiotic azithromycin detected by mass spectrometry.

8 Results. Among diarrheal samples positive by nanoliter quantitative PCR for *Vibrio cholerae*  
9 (n=78/849), the odds that a rapid diagnostic test (RDT) or qPCR was positive was reduced by  
10 89% (OR 0.108; 95%CI 0.002-0.872) and 87% (OR 0.130; 95%CI 0.022-0.649) when lytic  
11 bacteriophage were detected, respectively. The odds that a rapid diagnostic test (RDT) or qPCR  
12 was positive was reduced by more than 99% (OR 0.00; 95% CI: 0.00-0.28) and 89% (OR 0.11;  
13 95% CI: 0.03-0.44) when azithromycin was detected, respectively.

14 Conclusions. Estimations of cholera burden may improve by accommodating for the negative  
15 effect of antimicrobial exposure on diagnostic positivity. Furthermore, the findings herein  
16 challenge our current approach to interpreting and developing bacterial diagnostics given  
17 variable rates of lytic bacteriophage and antibiotic exposure.

## 18 **BACKGROUND**

19 There are approximately 4.5 billion diarrheal diseases cases per year [1]. While the 2-4 million  
20 cases of cholera that occur annually represent a small fraction of the total cases [2], cholera  
21 inflicts high morbidity and mortality on populations with extreme poverty. Outbreaks begin when  
22 immunologically susceptible human hosts are exposed to the Gram-negative pathogen *V.*  
23 *cholerae* (O1 and O139 serogroups) from contaminated food or water [3]. Before modern  
24 rehydration regimens, mortality rates rose above 20% [4] from acute secretory diarrhea resulting  
25 from the action of cholera toxin [3]. Treated with oral or intravenous rehydration, mortality rates  
26 decrease to less than one percent [5, 6]. Antibiotics are recommended for cholera patients with  
27 moderate to severe dehydration [7, 8], but in practice most cholera patients are likely ordered  
28 antibiotics. Asymptomatic cases are detected by a rise in antibody titer but negative stool  
29 studies [9]. Recovered patients become susceptible over time as a function of the durability of  
30 their immune response [3]. *V. cholerae* are shed from the human host with increased infectivity  
31 [10, 11]. This 'hyper-infectivity' is suggested to drive the exponential phase of outbreaks [12].

32 Patients can shed *V. cholerae* specific lytic bacteriophage (ICP1, 2, 3); ICP1 is specific for O1  
33 *V. cholerae* [13, 14]. These vibriophages are proposed to quench outbreaks based on data that  
34 a higher percentage of patients shed vibriophage during the collapse of an outbreak [15-17].  
35 Diagnostically, culture and PCR approaches are the best available 'gold-standards' for the  
36 detection of *V. cholerae* [18, 19]. Alternative methods include direct immuno-fluorescence  
37 microscopy for the O-antigen polysaccharide (OPS) [20], RDTs that rely on OPS specific  
38 antibodies, and recently by nl-qPCR [21, 22].

39 The rationale for this study was based on the recognition that cholera RDTs have limited  
40 adoption because of variable performance for unknown reasons [19, 23-26]; immediately testing  
41 stool samples demonstrated broad sensitivities (58-100%) and specificity (71-100%). A modified

42 method enriches for *V. cholerae* in alkaline peptone water (APW) to increase specificity to 91-  
43 99% yet is associated with a decrease in sensitivity [23, 24, 27]. Both lytic phage and antibiotics  
44 have been postulated to impact diagnostics [26]. Using cholera as a model, we tested the  
45 hypothesis that lytic bacteriophage, and antibiotics, negatively impact diagnostics within the  
46 confines of a previously published clinical study [28]. In brief, the study was conducted from  
47 September to December 2015 at a district and sub-district hospital in the remote Northern  
48 district of Netrokona that is prone to seasonal cholera outbreaks. Inclusion criteria were patients  
49 at least two-months old and presented with acute (< 7 days) diarrhea (>3 loose stools in the 24  
50 hours prior to admission) without complications.

## 51 **METHODS**

### 52 **Subjects**

53 This study was conducted with the confines of previously published studies in Bangladesh [28]  
54 and South Sudan [29]. Ethical approvals were obtained for the Bangladesh study at the  
55 Institutional Review Boards (IRBs) of Stanford University School of Medicine and the Institute of  
56 Epidemiology, Disease Control and Research, Bangladesh Ministry of Health and Family  
57 Welfare [28], and for South Sudan Study at the IRBs of Johns Hopkins Bloomberg School of  
58 Public Health and the South Sudan Ministry of Health, Directorate of Monitoring, Evaluation and  
59 Research [29]. Written informed consent was obtained from participants over 18 years, or  
60 guardians of participants.

### 61 **Clinical Study**

62 In Bangladesh, inclusion criteria were patients at least two-months of age presenting with acute  
63 (< 7 days) diarrhea (>3 loose stools in the prior 24 hours) without clinical complications. Sample  
64 collection occurred from September to December 2015 at a district and sub-district hospital in  
65 the remote Northern district of Netrokona that is prone to seasonal cholera outbreaks. In South  
66 Sudan, inclusion criteria were patients presenting at a cholera treatment center in Juba who

67 were at least 6 months-old, had diarrhea (>3 loose stools in the prior 24 hours) and no history of  
68 cholera vaccination. Samples were collected from August to September 2015.

## 69 **Laboratory Procedures**

70 For samples collected in Bangladesh, the methods have been previously described [21, 22]. In  
71 brief, the first stool sample voided was collected immediately after admission to avoid exposure  
72 to hospital administered antibiotics. The supernatants from *V. cholerae* positive stools were  
73 tested for antibiotic exposure using a LC/MS protocol for a 1100 series HPLC (Agilent  
74 Technologies) integrated with an LTQ XL ion trap mass spectrometer (Thermo Fisher Scientific)  
75 [21]. The stool samples were tested by RDT (Crystal VC, Span Diagnostics) after enrichment in  
76 APW for 6 hours or overnight [28]. The first and last samples collected per day were stored in  
77 Cary-Blair media (4°C) for culture at a central reference laboratory in Dhaka (icddr,b); samples  
78 were stored for up to 1 month. Aliquots (500 µl) from all patients were stored in 1.3ml RNA<sup>later</sup>  
79 (Invitrogen).

80 For Bangladesh samples, DNA was extracted using the MoBio Power Soil 96-well plate system  
81 (Qiagen; formerly PowerSoil). DNA extracts were screened in technical replicates for *V.*  
82 *cholerae* by qPCR in a 384-well Light Cycler (Roche) using *tcpA*<sup>set1</sup> primers (Table S1) [21].  
83 Samples that had CT values less than 25 were defined as positive. Samples with CT values  
84 from 25 to 31 were evaluated by PCR for *ompW* [8]. In parallel, nl-qPCR was performed in  
85 technical replicates with *tcpA*<sup>set1</sup> and additional targets [21, 22]. Cyber Green master mix (Sigma  
86 Aldrich) was used for both qPCR and nl-qPCR however there was 1.8-fold more DNA in nl-  
87 qPCR reactions. Cycle thresholds for positivity for qPCR and nl-qPCR were 29 and 28,  
88 respectively. 16S rDNA analysis utilized previously published methods and data [21] on nl-  
89 qPCR *V. cholerae* positive samples for *tcpA* (Table S1). Lytic vibriophages ICP1, 2, and 3 were  
90 detected by PCR (Table S1). For samples collected in South Sudan, analyses for *V. cholerae*

91 have been previously described on DNA extracted from dried stool spots [29]. In addition, the  
92 extracts were analyzed by PCR for ICP1 and ICP3 (ICP2 PCR technically failed; Table S1).  
93 Direct immune-fluorescence was performed as previously described on planktonic cells from  
94 RNA*later* preserved stool samples [30]. This fraction was obtained by a 15 seconds 100-G  
95 centrifugation to remove sediment from 500  $\mu$ l of sample, one PBS wash, pelleting the  
96 supernatant fraction, and resuspension of the pellet in 500  $\mu$ l of PBS with 3.7% formalin. Mock  
97 positive control stool samples were used for molecular and microscopy assays that consisted of  
98 *V. cholerae* set to concentrations relative to cholera stool (5e8 CFU/ml and 1e8CFU/ml) in 500  
99 ml normal saline plus 1.3 ml RNA*later* (ratio used in stool storage).

## 100 **Statistical analysis**

101 Latent class modeling was used to estimate sensitivities and specificities of each diagnostic  
102 [31]. For prior information, the assumptions for sensitivities were the same for RDT, qPCR, nl-  
103 qPCR and culture (50-100%). Assumptions for specificities were 50-100% for RDT, 90-100% for  
104 qPCR and nl-qPCR, and 99-100% for culture [18]. Gibbs sampling with 100,000 iterations was  
105 used to generate posterior estimates with 95% credible intervals (CI). Fischer's exact test was  
106 used to evaluate associations between diagnostic type and detection of lytic bacteriophage /  
107 azithromycin. Both sample odds ratios and estimated sample odds ratios with a conditional  
108 Maximum Likelihood Estimate were computed. A two-sample Wilcoxin test was used to  
109 compare CT values between diagnostic positive and negative samples among samples positive  
110 for *V. cholerae* positive by nl-qPCR CT. Comparison of microbiota (16S rDNA analysis) by  
111 diagnostic result and exposure among nl-qPCR positive samples was conducted by  
112 PERMANOVA as previously described [21]. Missingness in the dataset is designated as 'NA'  
113 and is restricted to laboratory results. Statistical analyses were completed in Graphpad Prism  
114 8.0.1 and R v3.4.1 / RStudio v1.1.0153 [32].

115

## 116 **Data availability**

117 Data analyzed in the manuscript have been made available in the online supplementary  
118 material.

## 119 **RESULTS**

### 120 **Sensitivity and specificity estimates by latent class modeling**

121 In Bangladesh, stool samples were collected from 881 of 961 enrolled patients. Among samples  
122 tested by RDT, qPCR, and nl-qPCR, the distribution of diagnostic positivity is provided (Fig  
123 1A,B). The sensitivities and specificities of each diagnostic were estimated using a Bayesian  
124 latent class modeling framework, which enables estimation of diagnostic accuracy in the  
125 absence of a perfect reference standard by integrating data from multiple tests [31]. Estimates  
126 for sensitivity of RDT, qPCR, and nl-qPCR were 31.5% (95% CI:21.5–43.7), 64.1% (CI: 50.7-  
127 80.2) and 97.6% (95% CI: 89.0–100.0), respectively. The specificities were 99.6% (95% CI:  
128 99.0–99.9), 99.9% (95% CI: 99.7–100.0) and 99.6% (95% CI: 98.3–100.0), respectively. Among  
129 the subset of samples randomly chose for culture (16 positive out of 251), sensitivity was 57.1%  
130 (40.4-73.2) and specificity 99.7 (99.3-99.9). Based on these results, nl-qPCR was selected as  
131 the best available reference standard for subsequent analysis and the receiver operator curve  
132 (ROC) is presented (Fig 1C).

### 133 **Impact of lytic phage on diagnostic positivity**

134 Among *V. cholerae* positive samples by nl-qPCR, 19.2% (15/78) and 1.3% (1/78) were positive  
135 for ICP1 and 2, respectively; ICP3 was not detected. Of 180 random samples negative by nl-  
136 qPCR, qPCR and RDT, two patients had ICP1 (one was culture positive) and one had ICP2.  
137 Among *V. cholerae* positive samples by nl-qPCR that lacked azithromycin, vibriophage were  
138 negatively associated with diagnostic positivity by RDT (OR 0.11; 95% CI: 0.002-0.87), qPCR  
139 (OR 0.13; 95% CI: 0.02-0.65) and direct immuno-fluorescent microscopy [30] (OR 0.18; 95% CI  
140 0.02-1.031; Table 1). Frequencies of vibriophage detection were different between study sites

141 (Fischer's exact test;  $p = 0.033$ ). Diarrheal samples from South Sudan were analyzed to  
142 increase generalizability [29]. ICP1 was detected in 10.2% ( $n=10/98$ ) of all enriched samples,  
143 24% of samples ( $n=7/29$ ) that were PCR positive samples for *V. cholerae* and 5.7% ( $n=3/69$ ) of  
144 samples that were RDT negative by PCR for *V. cholerae*. ICP1 was negatively associated with  
145 RDT positivity after enrichment (OR 0.00, 95%CI 0.00-0.64,  $p=0.010$ ; Table S2); a statistically  
146 significant difference was not observed for unenriched samples. ICP3 was not identified. There  
147 were insufficient samples to assess phage impact on culture positivity.

#### 148 **Impact of azithromycin on diagnostic positivity**

149 Among Bangladesh samples positive by nl-qPCR but negative for bacteriophage, azithromycin  
150 was negatively associated with diagnostic positivity by RDT (OR 0.00; 95% CI: 0.00-0.28) and  
151 qPCR (OR 0.11; 95% CI: 0.03-0.44), but not by direct fluorescent microscopy (OR 0.54; 95% CI  
152 0.14-1.97; Table 2). Azithromycin was negatively associated with culture positivity (OR 0.00,  
153 95% 0.00-0.997; Table 2).

#### 154 **Absolute and relative *V. cholerae* concentration.**

155 Absolute and relative *V. cholerae* concentration was assessed by nl-qPCR and 16S rDNA  
156 analysis, respectively. Among nl-qPCR positive samples, there was a significant inverse  
157 relationship between diagnostic positivity and *V. cholerae* concentration (Table S3). With no  
158 exclusions, fold-differences between positive and negative samples ranged from 21-fold  
159 (culture) to 79-fold (qPCR). The one exception was that phage exposure (azithromycin samples  
160 excluded) did not associate with a significant difference in the nl-qPCR Ct values between  
161 culture positive ( $n=13$ ; Ct = 19.4, 95% CI 14.3-22.0) and negative samples ( $n=9$ ; Ct =20.8, 95%  
162 CI 17.6-25.9;  $p=0.186$ ). Statistically significant differences in microbiota (16S rDNA) were  
163 observed between RDT positive and negative stools with stratifications for bacteriophage (Fig  
164 S2A) and azithromycin (Fig S2B).



## 165 **DISCUSSION**

166 This study investigated the potential vulnerability diagnostics have when bacterial targets are  
167 exposed to lytic bacteriophage predation or antibiotics. Using cholera as a model system and  
168 nl-qPCR as a reference standard for *V. cholerae*, we found that the odds of a RDT, qPCR and  
169 microscopy diagnostic testing positive were reduced by more than 83% when lytic  
170 bacteriophage were present. Similarly, the odds of a RDT, qPCR and culture testing positive  
171 were reduced by more than 89% when the first-line antibiotic azithromycin was detected in stool  
172 by mass spectrometry. These results expose a vulnerability of gold-standard diagnostics that  
173 clinicians and microbiologists feared but lacked sufficient data to take evidence-based action.

174 We reason that the low inflection point in the ROC at approximately 0.7 sensitivity is multi-  
175 factorial (Fig 1C). We explored the effect on sensitivity and specificity of adding ICP1 detection  
176 as a proxy for *V. cholerae* detection (Fig 1C). Both qPCR, culture and the RDT moderately  
177 improved. The effects of lytic bacteriophage, antibiotics and host antimicrobial factors on  
178 diagnostic positivity are likely additive, especially given that these diagnostics target different  
179 biologic mechanisms. How duration of illness and severity of disease serve as determinants of  
180 diagnostic positivity also remain unknown. Time-series analyses of cholera patients with defined  
181 antimicrobial exposures are needed steps to further these lines of inquiry.

182 These findings should be viewed within the context of the limitations of the study. The  
183 procedures were chosen for feasibility at remote field sites. This delayed cultures up to one-  
184 month and precluded plaque assays. The higher detection rate of nl-qPCR compared to qPCR  
185 was multi-factorial, including the 1.8-fold difference in DNA. The positive nl-qPCR samples that  
186 were negative by qPCR and negative by *ompW* were unlikely to be false positives because  
187 *Vibrio* spp. were detected by 16S rDNA analysis in all 13 samples that did not have lytic  
188 vibriophage; those with vibriophage did not result (n=7/7). Among nl-qPCR positive and qPCR

189 negative samples, PCR detection for *tpcA* correlated with PCR detection of *ctxA* (cholera toxin;  
190 n=5/5; Table S1). These toxin data, paired with serologic results that found only O1 *V. cholerae*,  
191 makes the possibility of confounding from non-O1 *V. cholerae* unlikely. Despite these  
192 limitations, the discovery that lytic bacteriophage negatively impacts diagnostics, even to the  
193 point that samples will test positive for bacteriophage and negative for the pathogen, has broad  
194 significance. One explanation is lytic bacteriophage and antibiotics inhibit bacterial growth below  
195 the diagnostic limits of detection. Alternatively, bacteriophage nucleases, or host nucleases  
196 responding to bacteriophage infection, may digest host chromosomal DNA to the point that PCR  
197 fails [33, 34].

## 198 **Conclusion**

199 Within the cholera field, this study suggests that more nuanced analytical approaches are  
200 needed to determine the true cholera burden during outbreaks, especially in the latter phases  
201 when rates of concurrent lytic bacteriophage predation are likely higher [16, 17]. This may  
202 require an approach that includes lytic bacteriophage detection as a proxy for pathogen  
203 detection and a de-emphasis on diagnostic results with known antibiotic exposure. Outside the  
204 cholera field, these data serve as a call-to-action to survey for lytic bacteriophage when  
205 bacterial diagnostics have inconsistent performance, especially when there is discordance  
206 between clinical presentation and diagnostic result. These efforts may justify a new line of  
207 diagnostic development that targets both the prey (pathogen) and predator (bacteriophage).

208 **Acknowledgements**

209 We thank the patients for participating in this study, the field and central project staff, and  
210 diligent clinical team who made this study possible. We are grateful to M. Barry, S. Luby and Y.  
211 Maldonado for their support at Stanford University, as well as G. Morris, A. Ali, M. Alam, E.  
212 Schmidt, R. Autrey, K. Berquist and S. Rivkees at the University of Florida for their support,  
213 reagents and helpful discussions.

214 **Disclaimer**

215 These funders had no role in study design, data collection and analysis, decision to publish, or  
216 preparation of the manuscript.

217 **Financial Support**

218 This work was supported by the National Institutes of Health [DP5OD019893] to EJN,  
219 [R01AI123422-01] to DAS and AKD and internal support from the University of Florida and the  
220 Stanford University Center for Innovation in Global Health, Translational and Applied Medicine  
221 program, and the Child Health Research Institute. DLC was funded by Bill and Melinda Gates  
222 through their active support of the Institute for Disease Modeling (Bellevue, WA) and  
223 sponsorship through the Global Good Fund.

224 **Disclaimer**

225 These funders had no role in study design, data collection and analysis, decision to publish, or  
226 preparation of the manuscript.

227 **Potential conflicts of interest.**

228 All authors: No reported conflicts.

229

230 **FIGURE LEGENDS**

231 **Figure 1.** Diagnostic evaluation. **A.** Euler diagram of diagnostic positivity for qPCR, nl-qPCR,  
232 and RDT; area within each circle is relative to the degree of positivity. **B.** Comparison Ct values  
233 between qPCR and nl-qPCR analysis with ICP1 and ICP2 metadata; horizontal and vertical  
234 dotted lines depict thresholds of positivity for each test; ND= not detected. **C.** Receiver operator  
235 characteristic (ROC) curve. Estimates of the sensitivity and 1-specificity of combining  
236 diagnostics are defined in the key and vertical bars from each symbol depict the 95% CI.

237 **Insert 1 (Figure 1)**  
 238  
 239  
 240

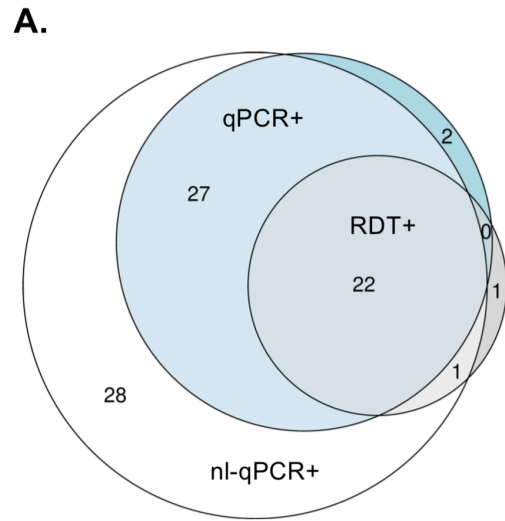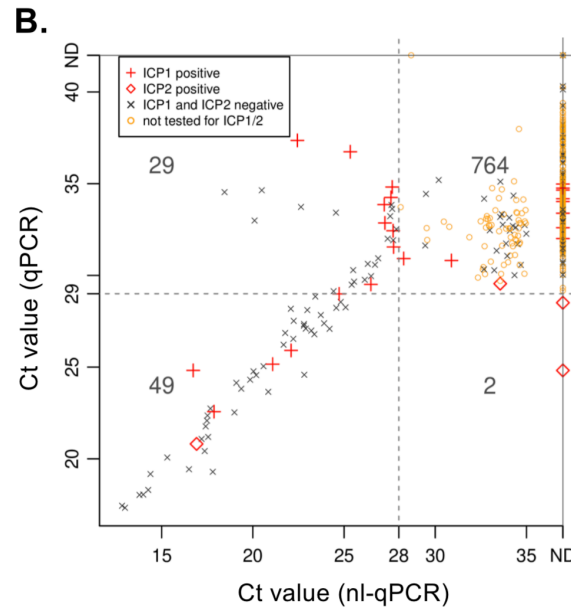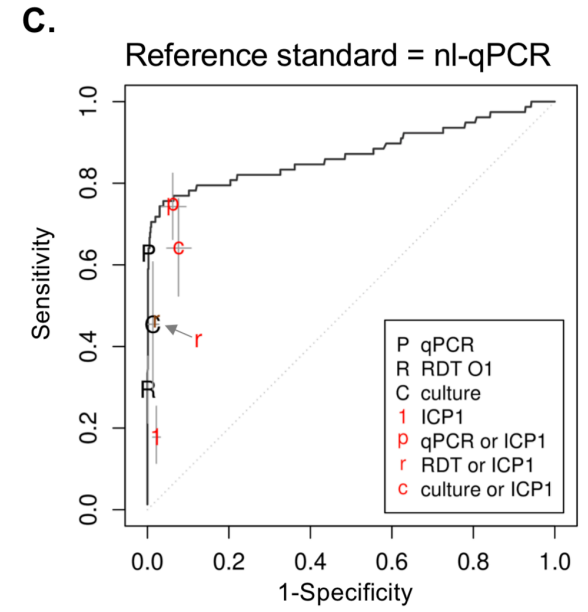

241  
 242  
 243  
 244  
 245

246 **Insert 2 (Table 1)**

247

248

249

250 **Table 1.**

251 **Lytic phage negatively impact diagnostic positivity (azithromycin excluded)**

| Diagnostic (Dx)         | N <sup>a</sup> | Dx positive among phage exposed | Dx positive among phage unexposed | OR <sup>b</sup> | OR_MLE <sup>c</sup> | CI <sup>c</sup> | p <sup>d</sup> |
|-------------------------|----------------|---------------------------------|-----------------------------------|-----------------|---------------------|-----------------|----------------|
| RDT                     | 56             | 9% (1/11)                       | 49% (22/45)                       | 0.105           | 0.108               | 0.002-0.872     | 0.019          |
| qPCR                    | 56             | 36% (4/11)                      | 83% (37/45)                       | 0.124           | 0.130               | 0.022-0.649     | 0.005          |
| Microscopy <sup>e</sup> | 52             | 20% (2/10)                      | 60% (25/42)                       | 0.170           | 0.176               | 0.016-1.031     | 0.036          |
| Culture <sup>f</sup>    | 22             | --- (0/0)                       | 59% (13/22)                       | ---             | ---                 | ---             | ---            |

252 <sup>a</sup> *V. cholerae* positive samples by nl-qPCR without azithromycin detected in the stool by mass spectrometry

253 <sup>b</sup> Sample odds ratio =OR

254 <sup>c</sup> Estimated odds ratio with conditional Maximum Likelihood Estimate (MLE); CI = 95<sup>th</sup> confidence interval

255 <sup>d</sup> Fischer's exact test

256 <sup>e</sup> Indeterminant samples were considered negative; limit of detection 100-1000 CFU/ ml

257 <sup>f</sup> Insufficient samples with phage for statistical analysis

258

259

260

261 **Insert 3 (Table 2)**

262

263

264 **Table 2.**

265 **Azithromycin negatively impacts diagnostic positivity (phage excluded)**

| Diagnostic (Dx)         | N <sup>a</sup> | Dx positive among azithro exposed | Dx positive among azithro unexposed | OR <sup>b</sup> | OR_MLE <sup>c</sup> | CI <sup>c</sup> | p <sup>d</sup> |
|-------------------------|----------------|-----------------------------------|-------------------------------------|-----------------|---------------------|-----------------|----------------|
| RDT                     | 63             | 0% (0/18)                         | 49% (22/45)                         | 0.000           | 0.000               | 0.000-0.282     | <0.001         |
| qPCR                    | 63             | 33% (6/18)                        | 82% (37/45)                         | 0.108           | 0.113               | 0.026-0.437     | <0.001         |
| Microscopy <sup>e</sup> | 58             | 44% (7/16)                        | 60% (25/42)                         | 0.529           | 0.535               | 0.139-1.973     | 0.378          |
| Culture <sup>f</sup>    | 27             | 0% (0/5)                          | 59% (13/22)                         | 0.000           | 0.000               | 0.000-0.997     | 0.041          |

266 <sup>a</sup> *V. cholerae* positive samples by nl-qPCR without lytic bacteriophage (ICP1,2,3) detected in the stool by PCR

267 <sup>b</sup> Sample odds ratio =OR

268 <sup>c</sup> Estimated odds ratio with conditional Maximum Likelihood Estimate (MLE); CI = 95<sup>th</sup> confidence interval

269 <sup>d</sup> Fischer's exact test

270 <sup>e</sup> Indeterminant samples were considered negative; limit of detection 100-1000 CFU/ ml

271 <sup>f</sup> Insufficient samples with phage for statistical analysis

272

273

274 **Supplement Material:**  
275 **Table of contents**

- 276 1. **Fig. S1.** Diagnostic positivity and ICP1 detection in South Sudan and Bangladesh
- 277 2. **Fig. S2.** Microbiota distribution as a function of bacteriophage and azithromycin detection
- 278 3. **Table S1.** Reagents
- 279 4. **Table S2.** South Sudan: Impact of bacteriophage ICP1 on cholera RDT positivity
- 280 5. **Table S3.** Fold-differences in DNA concentration among *V. cholerae* positive samples by nl
- 281 qPCR
- 282 6. **Dataset**

283

284 **Figure S1**  
285

**A. South Sudan Positivity**

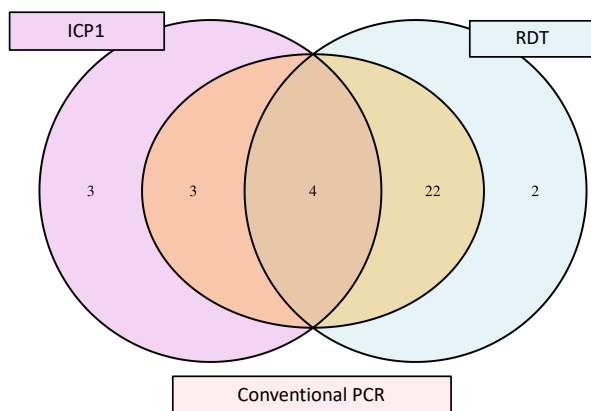

**B. Bangladesh Positivity**

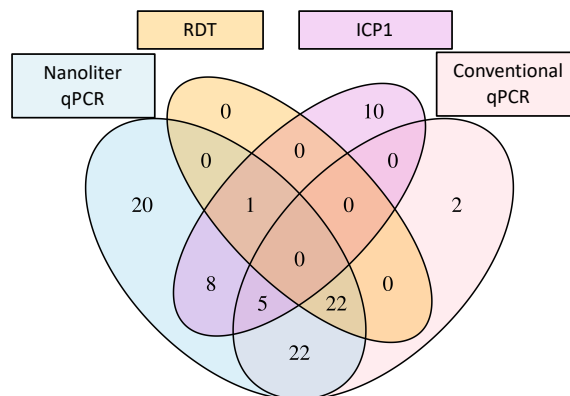

286  
287  
288  
289  
290  
291  
292  
293  
294  
295  
296

**Figure S1.** Comparison of diagnostic positivity and ICP1 detection in the libraries from South Sudan (**A**) and Bangladesh (**B**). RDT= rapid diagnostic test. Both settings used the Crystal VC test with enrichment. Data presented from S. Sudan is based on PCR performed at Institute Pasteur (Table S2).



297 **Figure S2**  
298

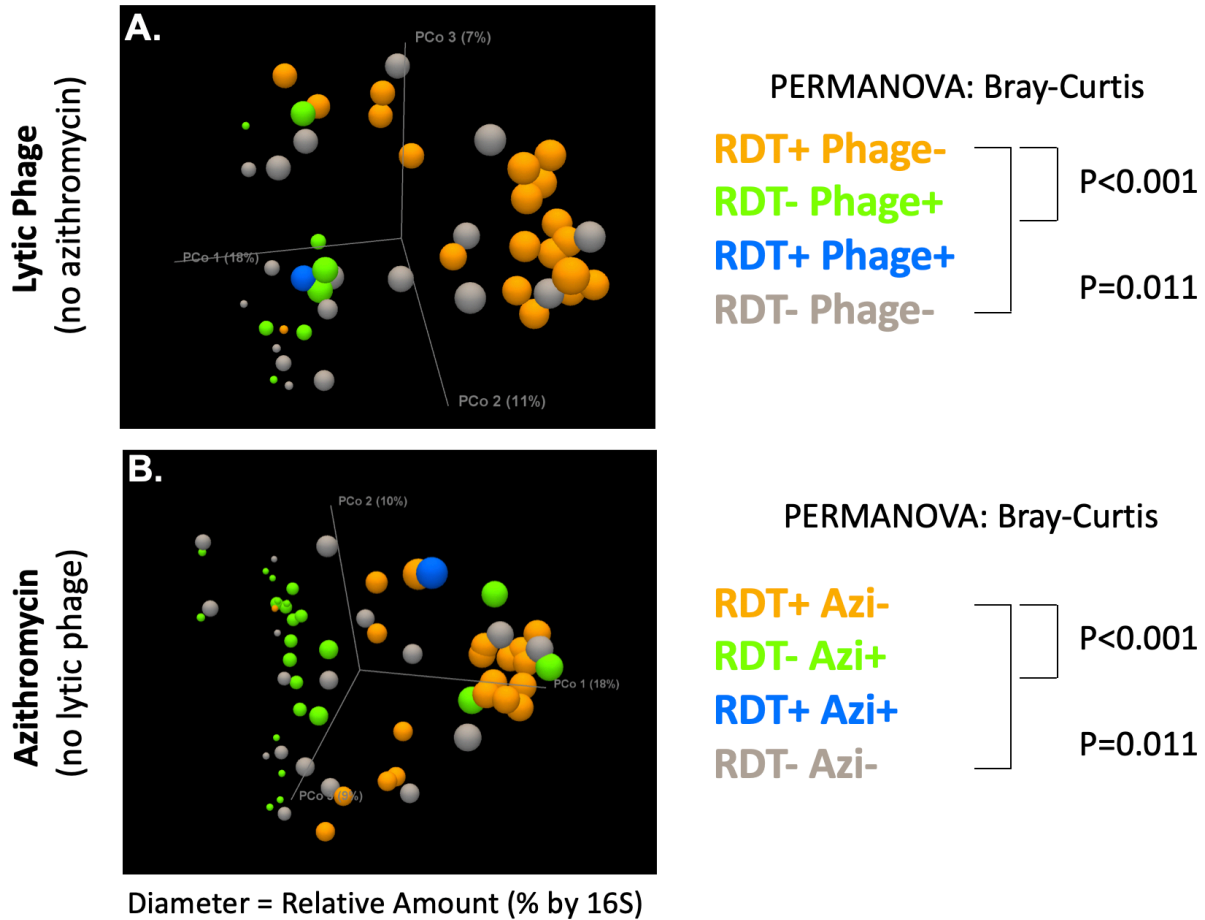

299  
300  
301  
302  
303  
304  
305  
306  
307  
308  
309  
310  
311

**Figure S2.** Principal component analysis of 16S rDNA analysis of *V. cholerae* positive samples by nl-qPCR analysis as previously described[21]. **A.** Among samples without azithromycin detection, data are color coded based on RDT and phage positivity (right). **B.** Among samples without bacteriophage detection, data are color coded based on RDT and azithromycin positivity (right). PC1 is oriented horizontally and the icon size is set to the relative percentage of *V. cholerae* detected in the microbiota (0-25%, 26-50%, 51-75%, 76-100%). For both the upper and lower panels, statistically significant differences between groups were detected by PERMANOVA (Bray-Curtis)[21]. *V. cholerae* positivity is defined by nl-qPCR positivity with either tcpA primer sets to be consistent with prior analytic approach[21].

312 **Table S1. Reagents**

| <b>Reagent</b>     |                         |                                                                                                   |                        |
|--------------------|-------------------------|---------------------------------------------------------------------------------------------------|------------------------|
| <b>Bacterium</b>   | <b>Strain</b>           | <b>Description</b>                                                                                | <b>Reference</b>       |
| <i>V. cholerae</i> | E7946                   | O1 serogroup, isolated from Bahrain*, SmR                                                         | Mekalanos [35]         |
| <i>V. cholerae</i> | ENV2                    | Non-O1, from Haiti*, SmS                                                                          | Rahman et al. [36]     |
| <i>V. cholerae</i> | VC037; 280 NAG          | Non-O1, from India*, ATCC25872, SmR                                                               | Felsenfeld et al. [37] |
| <b>PCR target</b>  | <b>Primer name</b>      | <b>Sequence 5' – 3'</b>                                                                           |                        |
| <i>ctxA</i>        | ctxA_F                  | CTCAGACGGGATTTGTTAGGCACG                                                                          | Hoshino et al. [38]    |
|                    | ctxA_F                  | TCTATCTCTGTAGCCCTATTACG                                                                           |                        |
| <i>ompW</i>        | ompW_F                  | CACCAAGAAGGTGACTTTATTGTG                                                                          | Nandi et al. [39]      |
|                    | ompW_R                  | GAAGTTATAACCCACCCGCG                                                                              |                        |
| <i>tcpA</i>        | tcpA <sup>set1</sup> _F | ACTAAGGCTGCGCAAATCT                                                                               | Grembi & Spormann[22]  |
|                    | tcpA <sup>set1</sup> _R | GCCTCATCAGCTGAAACCTT                                                                              |                        |
| <i>tcpA</i>        | tcpA <sup>set2</sup> _F | ACACGATAAGAAAACCGGTCA                                                                             | Grembi & Spormann[22]  |
|                    | tcpA <sup>set2</sup> _R | GCCTTGGTCATATTCTGCGA                                                                              |                        |
| ICP1               | ICP1gp58F               | AACGCTGCTTTTCCTTTTGA                                                                              | Seed et al. [14]       |
|                    | ICP1gp58R               | CCCAGCATTGAGGACACTT                                                                               |                        |
| ICP2               | ICP2_4F                 | CGCTAGTTCTGGCAGTGA GT                                                                             | Alexandrova et al.[21] |
|                    | ICP2_4R                 | TCCGTTCCAGTTCCAACAGG                                                                              |                        |
| ICP2               | ICP2_24R                | AGAAGTCGCAAACGGGGTAC                                                                              | Alexandrova et al.[21] |
|                    | ICP2_24R                | AACGTGGTTCTCGTGAGTGG                                                                              |                        |
| ICP3               | ICP3gp5F                | ATTGTTCGAGTGGGACAAAGG                                                                             | Seed et al. [14]       |
|                    | ICP3gp5F                | ACCAACTCGACGCATAGCTT                                                                              |                        |
| 16S rDNA**         | Maeda_1048_1067_F       | GTGSTGCAYGGYTGTCGTCA                                                                              | Maeda et al. [40]      |
|                    | Maeda_1175_1194_R       | ACGTCRTCCMCACCTTCCTC                                                                              |                        |
| 16S rDNA**         | 27F_Miseq               | <u>AATGATACGGCGACCACCGAGATCTACA</u><br><b><u>C</u>TATGGTAATTccAGMGTTYGATYMTGG</b><br>CTCAG        | Chung et al. [41]      |
|                    | 338rcbc1                | <u>CAAGCAGAAGACGGCATAACGAGAT</u><br><b><u>ACGAGACTGATTAGTCAGTCAG</u>GaaGCTG</b><br>CCTCCCGTAGGAGT |                        |

313 \* Strain used as a control strain for testing specificity of *tcpA* primers set1 and set2.  
 314 \*\* 16S rDNA primer pair used for nanoliter qPCR. Degenerate primers are coded per standard convention  
 315 (<http://arep.med.harvard.edu/labgc/adnan/projects/Utilities/revcomp.html>). Example of 16S rDNA primer pair used for  
 316 microbiome analysis. Degenerate primers are coded per standard convention. Structure of forward primer: (i) 5'  
 317 Illumina adapter, (ii) *Forward primer pad*, (iii) Forward primer linker (lower case), (iv) Forward primer. Structure of  
 318 reverse primer example: (i) Reverse complement of 3' Illumina adapter (underlined), (ii) Golay barcode (bold text), (iii)  
 319 Reverse primer pad (italics), (iv) Reverse primer linker (lower case), (v) Reverse primer.  
 320

321 **Table S2.** South Sudan: Impact of bacteriophage ICP1 on cholera RDT positivity

| Diagnostic Test                              | Total | Diagnostic Positive |           | Diagnostic Negative |           | OR <sub>MLE</sub> <sup>a</sup> | CI <sup>a</sup> | P <sup>b</sup> |
|----------------------------------------------|-------|---------------------|-----------|---------------------|-----------|--------------------------------|-----------------|----------------|
|                                              |       | Phage Pos           | Phage Neg | Phage Pos           | Phage Neg |                                |                 |                |
| Among VC PCR positive (Hopkins) <sup>c</sup> |       |                     |           |                     |           |                                |                 |                |
| RDT (Direct) <sup>d</sup>                    | 32    | 7                   | 26        | 1                   | 0         | ---                            | ---             | ---            |
| RDT (Enriched)                               | 34    | 5                   | 25        | 3                   | 1         | 0.075                          | 0.001-1.137     | 0.033          |
| Among VC PCR positive (Pasteur) <sup>c</sup> |       |                     |           |                     |           |                                |                 |                |
| RDT (Direct) <sup>d</sup>                    | 29    | 6                   | 22        | 1                   | 0         | ---                            | ---             | ---            |
| RDT (Enriched)                               | 29    | 4                   | 22        | 3                   | 0         | 0.000                          | 0.000-0.641     | 0.010          |

<sup>a</sup> Estimated odds ratio with conditional Maximum Likelihood Estimate (MLE); CI = 95<sup>th</sup> confidence interval

<sup>b</sup> Fischer's exact test

<sup>c</sup> Conventional PCR was performed by Johns Hopkins University and Institute Pasteur for cross validation [29].

<sup>d</sup> 'Direct' = tested directly from stool; 'Enriched' = grown in selective media (APW) prior to testing. Values reported in the main text and Figure S1 are derived from the Institute Pasteur data set.

<sup>e</sup> Insufficient sample size for statistical analysis

322  
323  
324  
325  
326  
327

**Table S3.**  
**Fold-differences in target DNA detection among *V. cholerae* positive samples**

| Diagnostic Test                                             | Total <sup>1</sup> | Diagnostic Positive        | Diagnostic Negative        | Fold-difference | p <sup>2</sup> |
|-------------------------------------------------------------|--------------------|----------------------------|----------------------------|-----------------|----------------|
|                                                             |                    | Median nl-qPCR Ct (n; IQR) | Median nl-qPCR Ct (n; IQR) |                 |                |
| No exclusion                                                |                    |                            |                            |                 |                |
| RDT                                                         | 78                 | 19.0 (23; 16.5-21.7)       | 24.4 (55; 21.1-27.7)       | 42              | <0.001         |
| qPCR                                                        | 78                 | 20.2 (49; 17.4-22.9)       | 26.5 (29; 24.9-27.6)       | 79              | <0.001         |
| Microscopy <sup>3</sup>                                     | 71                 | 20.3 (34; 17.3-23.0)       | 25.1 (37; 21.5-27.3)       | 28              | <0.001         |
| Culture                                                     | 29                 | 19.4 (13; 14.3-22.0)       | 23.8 (16; 17.7-25.5)       | 21              | 0.013          |
| Includes samples with azithromycin (excludes phage samples) |                    |                            |                            |                 |                |
| RDT                                                         | 63                 | 18.4 (22; 16.2-21.1)       | 23.9 (41; 21.3-26.2)       | 46              | <0.001         |
| qPCR                                                        | 63                 | 20.2 (43; 17.4-22.9)       | 26.2 (20; 24.5-27.5)       | 65              | <0.001         |
| Microscopy <sup>3</sup>                                     | 58                 | 20.3 (32; 17.4-23.2)       | 24.5 (26; 20.7-26.2)       | 18              | 0.002          |
| Culture                                                     | 27                 | 19.4 (13; 14.3-22.0)       | 23.8 (14; 17.8-25.5)       | 21              | 0.011          |
| Includes samples with phage (excludes azithromycin samples) |                    |                            |                            |                 |                |
| RDT                                                         | 56                 | 19.0 (23; 16.5-21.7)       | 24.6 (33; 21.1-27.0)       | 48              | <0.001         |
| qPCR                                                        | 56                 | 19.9 (41; 17.4-22.8)       | 27.2 (15; 25.4-27.6)       | 163             | <0.001         |
| Microscopy <sup>3</sup>                                     | 52                 | 19.1 (27; 17.2-22.8)       | 24.8 (25; 21.5-27.2)       | 53              | <0.001         |
| Culture                                                     | 22                 | 19.4 (13; 14.3-22.0)       | 20.8 (09; 17.6-25.9)       | 2.8             | 0.186          |

<sup>1</sup> Nanoliter (nL) qPCR positive for *V. cholerae* (Ct < 28); a random subset were cultured or available for microscopy.

<sup>2</sup> Mann-Whitney U test (two-tailed)

<sup>3</sup> Indeterminant samples scored as negative; limit of detection 100-1000 CFU/ ml

328  
329  
330  
331

## 332 References

333 [Main text and supplement references are combined]

- 334 1. Global Burden of Disease Collaborators. Estimates of the global, regional, and national  
335 morbidity, mortality, and aetiologies of diarrhoea in 195 countries: a systematic analysis for the  
336 Global Burden of Disease Study 2016. *Lancet Infect Dis* **2018**; 18:1211-28.
- 337 2. Ali M, Nelson AR, Lopez AL, Sack DA. Updated global burden of cholera in endemic countries.  
338 *PLoS Negl Trop Dis* **2015**; 9:e0003832.
- 339 3. Nelson EJ, Harris JB, Morris JG, Jr., Calderwood SB, Camilli A. Cholera transmission: the host,  
340 pathogen and bacteriophage dynamic. *Nat Rev Microbiol* **2009**; 7:693-702.
- 341 4. D'Herelle F, Malone R. A preliminary report of work carried out by the cholera bacteriophage  
342 enquiry. *Indian Medical Gazette* **1927**:614-7.
- 343 5. Kaper JB, Morris JG, Jr., Levine MM. Cholera. *Clin Microbiol Rev* **1995**; 8:48-86.
- 344 6. Musekiwa A, Volmink J. Oral rehydration salt solution for treating cholera:  $\leq 270$  mOsm/L  
345 solutions vs  $\geq 310$  mOsm/L solutions. *Cochrane Database Syst Rev* **2011**:CD003754.
- 346 7. Leibovici-Weissman Y, Neuberger A, Bitterman R, Sinclair D, Salam MA, Paul M. Antimicrobial  
347 drugs for treating cholera. *Cochrane Database Syst Rev* **2014**:CD008625.
- 348 8. Nelson EJ, Nelson DS, Salam MA, Sack DA. Antibiotics for both moderate and severe cholera.  
349 *N Engl J Med*; 364:5-7.
- 350 9. Arifuzzaman M, Ahmed T, Rahman MA, et al. Individuals with Le(a+b-) blood group have  
351 increased susceptibility to symptomatic *Vibrio cholerae* O1 infection. *PLoS Negl Trop Dis* **2011**;  
352 5:e1413.
- 353 10. Merrell DS, Butler SM, Qadri F, et al. Host-induced epidemic spread of the cholera  
354 bacterium. *Nature* **2002**; 417:642-5.
- 355 11. Nelson EJ, Chowdhury A, Flynn J, et al. Transmission of *Vibrio cholerae* is antagonized by  
356 lytic phage and entry into the aquatic environment. *PLoS Pathog* **2008**; 4:e1000187.
- 357 12. Hartley DM, Morris JG, Jr., Smith DL. Hyperinfectivity: a critical element in the ability of  
358 *Vibrio cholerae* to cause epidemics? *PLoS Med* **2006**; 3:e7.
- 359 13. Seed KD, Yen M, Shapiro BJ, et al. Evolutionary consequences of intra-patient phage  
360 predation on microbial populations. *Elife* **2014**; 3:e03497.
- 361 14. Seed KD, Bodi KL, Kropinski AM, et al. Evidence of a dominant lineage of *Vibrio cholerae*-  
362 specific lytic bacteriophages shed by cholera patients over a 10-year period in Dhaka,  
363 Bangladesh. *MBio* **2011**; 2:e00334-10.
- 364 15. Jensen MA, Faruque SM, Mekalanos JJ, Levin BR. Modeling the role of bacteriophage in the  
365 control of cholera outbreaks. *Proc Natl Acad Sci U S A* **2006**; 103:4652-7.
- 366 16. Faruque SM, Naser IB, Islam MJ, et al. Seasonal epidemics of cholera inversely correlate  
367 with the prevalence of environmental cholera phages. *Proc Natl Acad Sci U S A* **2005**; 102:1702-  
368 7.
- 369 17. Faruque SM, Islam MJ, Ahmad QS, et al. Self-limiting nature of seasonal cholera epidemics:  
370 Role of host-mediated amplification of phage. *Proc Natl Acad Sci U S A* **2005**; 102:6119-24.
- 371 18. Page AL, Alberti KP, Mondonge V, Rauzier J, Quilici ML, Guerin PJ. Evaluation of a rapid test  
372 for the diagnosis of cholera in the absence of a gold standard. *PLoS One* **2012**; 7:e37360.

- 373 19. Dick MH, Guillermin M, Moussy F, Chaignat CL. Review of two decades of cholera diagnostics-  
374 -how far have we really come? PLoS Negl Trop Dis **2012**; 6:e1845.
- 375 20. Hasan JA, Bernstein D, Huq A, Loomis L, Tamplin ML, Colwell RR. Cholera DFA: an improved  
376 direct fluorescent monoclonal antibody staining kit for rapid detection and enumeration of  
377 *Vibrio cholerae* O1. FEMS Microbiol Lett **1994**; 120:143-8.
- 378 21. Alexandrova L, Haque F, Rodriguez P, et al. Identification of widespread antibiotic exposure  
379 in cholera patients correlates with clinically relevant microbiota changes. J Infect Dis **2019**.
- 380 22. Grembi J, Mayer-Blackwell K, Luby S, Spormann A. High-throughput multi-parallel  
381 enteropathogen quantification via nano-liter qPCR. Available at: bioRxiv **2019** 746446; doi:  
382 <https://doi.org/10.1101/746446>
- 383 23. Debes AK, Ateudjieu J, Guenou E, et al. Clinical and Environmental Surveillance for *Vibrio*  
384 *cholerae* in Resource Constrained Areas: Application During a 1-Year Surveillance in the Far  
385 North Region of Cameroon. Am J Trop Med Hyg **2016**; 94:537-43.
- 386 24. George CM, Rashid MU, Sack DA, et al. Evaluation of enrichment method for the detection  
387 of *Vibrio cholerae* O1 using a rapid dipstick test in Bangladesh. Trop Med Int Health **2014**.
- 388 25. Ley B, Khatib AM, Thriemer K, et al. Evaluation of a rapid dipstick (Crystal VC) for the  
389 diagnosis of cholera in Zanzibar and a comparison with previous studies. PLoS One **2012**;  
390 7:e36930.
- 391 26. Alam M, Hasan NA, Sultana M, et al. Diagnostic limitations to accurate diagnosis of cholera.  
392 J Clin Microbiol **2010**; 48:3918-22.
- 393 27. Tuteja U, Kumar S, Shukla J, Kingston J, Batra HV. Simultaneous direct detection of toxigenic  
394 and non-toxigenic *Vibrio cholerae* from rectal swabs and environmental samples by sandwich  
395 ELISA. J Med Microbiol **2007**; 56:1340-5.
- 396 28. Haque F, Ball RL, Khatun S, et al. Evaluation of a Smartphone Decision-Support Tool for  
397 Diarrheal Disease Management in a Resource-Limited Setting. PLoS Negl Trop Dis **2017**;  
398 11:e0005290.
- 399 29. Ontweka LN, Deng LO, Rauzier J, et al. Cholera Rapid Test with Enrichment Step Has  
400 Diagnostic Performance Equivalent to Culture. PLoS One **2016**; 11:e0168257.
- 401 30. Nelson EJ, Chowdhury A, Harris JB, et al. Complexity of rice-water stool from patients with  
402 *Vibrio cholerae* plays a role in the transmission of infectious diarrhea. Proc Natl Acad Sci U S A  
403 **2007**; 104:19091-6.
- 404 31. Islam K, Sayeed MA, Hossen E, et al. Comparison of the Performance of the TPTest, Tubex,  
405 Typhidot and Widal Immunodiagnostic Assays and Blood Cultures in Detecting Patients with  
406 Typhoid Fever in Bangladesh, Including Using a Bayesian Latent Class Modeling Approach. PLoS  
407 Negl Trop Dis **2016**; 10:e0004558.
- 408 32. R Core Team: A language and environment for statistical computing. R Foundation for  
409 Statistical Computing. Available at: <http://www.R-project.org/>. Accessed Dec 29, 2019.
- 410 33. McKitterick AC, Hays SG, Johura FT, Alam M, Seed KD. Viral Satellites Exploit Phage Proteins  
411 to Escape Degradation of the Bacterial Host Chromosome. Cell Host Microbe **2019**; 26:504-14  
412 e4.
- 413 34. Warner HR, Snustad P, Jorgensen SE, Koerner JF. Isolation of bacteriophage T4 mutants  
414 defective in the ability to degrade host deoxyribonucleic acid. J Virol **1970**; 5:700-8.
- 415 35. Mekalanos JJ. Duplication and amplification of toxin genes in *Vibrio cholerae*. Cell **1983**;  
416 35:253-63.

- 417 36. Rahman M, Jubair M, Alam MT, et al. High-frequency rugose exopolysaccharide production  
418 by *Vibrio cholerae* strains isolated in Haiti. PLoS One **2014**; 9:e112853.
- 419 37. Felsenfeld O, Stegherr-Barrios A, Aldova E, Holmes J, Parrott MW. In vitro and in vivo studies  
420 of streptomycin-dependent cholera vibrios. Appl Microbiol **1970**; 19:463-9.
- 421 38. Hoshino K, Yamasaki S, Mukhopadhyay AK, et al. Development and evaluation of a multiplex  
422 PCR assay for rapid detection of toxigenic *Vibrio cholerae* O1 and O139. FEMS Immunol Med  
423 Microbiol **1998**; 20:201-7.
- 424 39. Nandi B, Nandy RK, Mukhopadhyay S, Nair GB, Shimada T, Ghose AC. Rapid method for  
425 species-specific identification of *Vibrio cholerae* using primers targeted to the gene of outer  
426 membrane protein OmpW. J Clin Microbiol **2000**; 38:4145-51.
- 427 40. Maeda H, Fujimoto C, Haruki Y, et al. Quantitative real-time PCR using TaqMan and SYBR  
428 Green for *Actinobacillus actinomycetemcomitans*, *Porphyromonas gingivalis*, *Prevotella*  
429 *intermedia*, *tetQ* gene and total bacteria. FEMS Immunol Med Microbiol **2003**; 39:81-6.
- 430 41. Chung WS, Walker AW, Louis P, et al. Modulation of the human gut microbiota by dietary  
431 fibres occurs at the species level. BMC Biol **2016**; 14:3.
- 432
